# Supplementary material for: Effects of a 12-week supervised resistance training program, combined with home-based physical activity, on physical fitness and quality of life in female breast cancer survivors: the EFICAN randomized controlled trial
Source: PubMed Central journal article supplement (PMC10442259; doi:10.1007/s11764-022-01192-1), 2022-03-22
Supplement: 11764_2022_1192_MOESM1_ESM.pdf [file 11764_2022_1192_MOESM1_ESM.pdf]

**Table S1.** Prescription of the resistance training intervention in terms of frequency, volume, intensity and progressions.

| Week                                       | 1                        | 2      | 3                         | 4      | 5      | 6      | 7      | 8      | 9     | 10    | 11    | 12    |
|--------------------------------------------|--------------------------|--------|---------------------------|--------|--------|--------|--------|--------|-------|-------|-------|-------|
| Session                                    | 1 2                      | 3 4    | 5 6                       | 7 8    | 9 10   | 11 12  | 13 14  | 15 16  | 17 18 | 19 20 | 21 22 | 23 24 |
| Phases                                     | Phase 1: Familiarization |        | Phase 2: Circuit Training |        |        |        |        |        |       |       |       |       |
| Sets                                       | 2                        | 2      | 2                         | 2      | 2      | 3      | 3      | 3      | 3     | 3     | 3     | 2     |
| Repetitions<br>(CE <sup>1</sup> Intensity) | 12(30)                   | 12(30) | 12(24)                    | 12(24) | 12(24) | 10(20) | 10(20) | 10(20) | 8(16) | 8(16) | 8(16) | 6(12) |
| Estimated Intensity (%RM <sup>2</sup> )    | ~40%                     | ~40%   | ~50%                      | ~50%   | ~50%   | ~55%   | ~55%   | ~55%   | ~60%  | ~60%  | ~60%  | ~70%  |
| Total reps per exercise                    | 24                       | 24     | 24                        | 24     | 24     | 30     | 30     | 30     | 24    | 24    | 24    | 12    |

<sup>1</sup>CE= Number of repetitions to be performed out of the total number of repetitions the participant could perform with the a given load (in brackets).

<sup>2</sup>RM= Repetition Maximum: the weight that can be lifted only once.

**Table S2.** Exercises performed along the resistance training program\*.

|                                                                                                                                              |                                                  | <b>Exercises</b>                                                                 | <b>Adaptations (if needed)</b>                                                                           |
|----------------------------------------------------------------------------------------------------------------------------------------------|--------------------------------------------------|----------------------------------------------------------------------------------|----------------------------------------------------------------------------------------------------------|
| <b>Preparatory part</b><br><br>Sets and repetition:<br>2x8<br><br>Exercise Intensity:<br>-OMNI-RES <sup>2</sup> 3/10<br>-CE <sup>3</sup> +12 | Aerobic activity                                 | 5 min of low intensity aerobic activity (50%-65% HRR <sup>1</sup> ) on Treadmill |                                                                                                          |
|                                                                                                                                              | Thoracic mobility exercises                      | Thoracic rotation in sitting position                                            |                                                                                                          |
|                                                                                                                                              |                                                  | Thoracic extension with fitball in sitting                                       | Perform unilaterally with the unaffected arm                                                             |
|                                                                                                                                              |                                                  | Column extension from prone in fitball                                           |                                                                                                          |
|                                                                                                                                              |                                                  | Thoracic rotation in standing                                                    |                                                                                                          |
|                                                                                                                                              | Core stability exercises                         | Pelvic tilt in sitting position                                                  |                                                                                                          |
|                                                                                                                                              |                                                  | Abdominal bracing in sitting position with fitball                               | Perform unilaterally with the unaffected arm                                                             |
|                                                                                                                                              |                                                  | Abdominal bracing with band in the transversal plane                             | If bracing can't be performed, the position is maintained, and the trainer creates tension in the band   |
|                                                                                                                                              |                                                  | Bird-dog                                                                         | Start from wall                                                                                          |
|                                                                                                                                              | Scapulohumeral joint stability exercises         | Humeral rotation without abduction in sitting position                           |                                                                                                          |
|                                                                                                                                              |                                                  | Scapulohumeral abduction of 60 ° in the scapular plane                           | Abduction is replaced for flexion                                                                        |
|                                                                                                                                              |                                                  | Traction (isometric scapulohumeral retropulsion) with 0 ° abduction              |                                                                                                          |
|                                                                                                                                              |                                                  | Internal rotation resisted with band and external rotation resisted with band    | Perform in isometry                                                                                      |
|                                                                                                                                              | Dynamic stability exercises                      | Bipodal to monopodal in the frontal plane                                        | Perform with a safety point in one hand                                                                  |
|                                                                                                                                              |                                                  | Lateral shift                                                                    | Perform with a safety point in one hand                                                                  |
|                                                                                                                                              |                                                  | Slow skipping                                                                    | Start from wall                                                                                          |
| Go up and down to a step with stop monopodal                                                                                                 |                                                  | Perform with a safety point in one hand                                          |                                                                                                          |
| <b>Resistance training</b>                                                                                                                   | Strength                                         | Bilateral Dead Lift                                                              | Progress from the last part of the exercise (rack pull) to the initial, increasing the ROM progressively |
|                                                                                                                                              |                                                  | Bilateral Seated Row                                                             | If it can't be done by dorsal flap reconstruction, perform unilaterally with the unaffected arm          |
|                                                                                                                                              |                                                  | Bilateral Squat                                                                  | Increasing the ROM progressively                                                                         |
|                                                                                                                                              |                                                  | Bilateral Seated Bench Press                                                     | If it can't be done by dorsal flap reconstruction, perform unilaterally with the unaffected arm          |
| <b>Cool-Down</b>                                                                                                                             | Dynamic/static stretching of major muscle groups | Pectoralis major, Dorsal Width, Quadriceps, Hamstrings                           |                                                                                                          |

|                              |  |  |  |
|------------------------------|--|--|--|
| Sets and repetition:<br>1x12 |  |  |  |
|------------------------------|--|--|--|

<sup>1</sup>HRR: heart rate reserve; <sup>2</sup>OMNI-RES: Perceived Exertion Scale for Resistance Exercise (0-10); <sup>3</sup>CE Number of repetitions that the participant could performed with the actual weight.

\* Note that not all these exercises will be performed in the same session. Rather, this represent the spectrum of exercises that are to be used along the training program.

### **Extended description of the standardized full-body muscular strength index.**

First, a z-score (z-score = [value—mean] / standard deviation) was computed for the change from baseline to week 12 in each of these tests:

- Seated bench press
- Seated row
- Isometric mid-thigh pull (IMTP)
- Knee extension in closed kinetic chain at 90°

The seated bench press z-score was computed as follows: The change from baseline to week 12 in the muscular strength of the right and left sides was added. A z-score for this sum was computed.

The seated row z-score was computed as follows: The change from baseline to week 12 in the muscular strength of the right and left sides was added. A z-score for this sum was computed.

The IMTP z-score was computed as follows: A z-score of the change from baseline to week 12 in the isometric mid-thigh pull (IMTP) test was computed.

The knee extension in closed kinetic chain at 90° z-score was computed as follows: The change from baseline to week 12 in the muscular strength of the right and left sides was added. A z-score for the sum was computed.

Finally, the standardized full-body muscular strength index was computed as the average of the 4 above-mentioned z-scores.

**Table S3.** Per-protocol (sensitivity) analyses assessing the effects of the exercise intervention on muscular strength, estimated VO<sub>2max</sub> and shoulder flexion range of motion in female breast cancer survivors, considering participants who attended ≥75% of the exercise sessions.

| Change from baseline at Week 12          | Intervention               |                          | Mean difference in the change from baseline to week 12 (95%CI) | Effect size (Cohen's <i>d</i> ) | P      |
|------------------------------------------|----------------------------|--------------------------|----------------------------------------------------------------|---------------------------------|--------|
|                                          | Exercise (n=28)            | Control (n=28)           |                                                                |                                 |        |
|                                          | Mean change (SE)           | Mean change (SE)         |                                                                |                                 |        |
| Full-body muscular strength, z-score     | 0.427 (0.124) <sup>†</sup> | -0.422 (0.121)           | 0.849 (0.501 to 1.197)                                         | -1.32                           | <0.001 |
| Upper-body muscular strength, z-score    | 0.398 (0.154)              | -0.423(0.154)            | 0.821 (0.384 to 1.257)                                         | -1.01                           | <0.001 |
| Lower body muscular strength, z-score    | 0.417 (0.135) <sup>†</sup> | -0.421 (0.133)           | 0.839 (0.458 to 1.219)                                         | -1.19                           | <0.001 |
| IMTP, N                                  | 303.7 (51.5) <sup>†</sup>  | 49.6 (50.5)              | 254.1 (108.4 to 399.9)                                         | -0.94                           | 0.001  |
| Bilateral seated bench press, N          | 67.1 (7.5)                 | 32.4 (7.5)               | 34.7 (13.6 to 55.9)                                            | -0.87                           | 0.002  |
| Bilateral seated row, N                  | 50.2 (6.7)                 | 9.8 (6.7)                | 40.5 (21.5 to 59.4)                                            | -1.14                           | <0.001 |
| Handgrip strength affected arm, kg       | 0.7 (0.5)                  | 0.5 (0.5) <sup>†</sup>   | 0.15 (-1.5 to 1.7)                                             | -0.08                           | 0.843  |
| Handgrip strength non-affected arm, kg   | 0.5 (0.5)                  | 0.6 (0.5) <sup>†</sup>   | -0.1 (-1.5 to 1.4)                                             | 0.04                            | 0.914  |
| Estimated VO <sub>2max</sub> , mL/kg/min | 0.51 (0.43)                | 0.83 (0.45) <sup>‡</sup> | -0.33 (-1.58 to 0.92)                                          | 0.14                            | 0.601  |
| Shoulder flexion (affected arm), °       | -0.9 (2.3)                 | 0.9 (2.4)                | -1.8 (-8.4 to 4.9)                                             | 0.14                            | 0.596  |
| Shoulder flexion (nonaffected arm), °    | -2.4 (2.2)                 | -4.3 (2.3)               | 1.8 (-4.6 to 8.1)                                              | -0.16                           | 0.586  |

SE, standard error; CI, confidence interval; IMTP, isometric mid-thigh pull; N, newtons.

<sup>†</sup> (n=27); <sup>‡</sup> (n=26)

**Table S4.** Per-protocol (sensitivity) analyses assessing the effects of the exercise intervention on cancer-related fatigue, depressive symptoms, health-related quality of life and life satisfaction in female breast cancer survivors.

| Change from baseline at Week 12      | Intervention     |                  | Mean difference in the change<br>from baseline to week 12<br>(95%CI) | Effect size<br>(Cohen's <i>d</i> ) | P     |
|--------------------------------------|------------------|------------------|----------------------------------------------------------------------|------------------------------------|-------|
|                                      | Exercise (n=29)  | Control (n=27)   |                                                                      |                                    |       |
|                                      | Mean change (SE) | Mean change (SE) |                                                                      |                                    |       |
| Cancer-related fatigue, FACT-F, 0-52 | 1.9 (1.1)        | 1.5 (1.2)        | 0.4 (-2.9 to 3.7)                                                    | -0.07                              | 0.803 |
| CES-D total score, 0-60              | -2.3 (1.4)       | 0.1 (1.5)        | -2.4 (-6.6 to 1.8)                                                   | 0.31                               | 0.253 |
| FACT-B                               |                  |                  |                                                                      |                                    |       |
| HRQoL, PWB subscale, 0-28            | 1.6 (0.6)        | 0.9 (0.6)        | 0.7 (-1.0 to 2.5)                                                    | -0.22                              | 0.405 |
| HRQoL, SWB subscale, 0-28            | -1.9 (0.7)       | -0.5 (0.7)       | -1.4 (-3.3 to 0.6)                                                   | 0.38                               | 0.162 |
| HRQoL, EWB subscale, 0-24            | 0.7 (0.4)        | 0.1 (0.5)        | 0.6 (-0.7 to 1.8)                                                    | -0.25                              | 0.362 |
| HRQoL, FWB subscale, 0-28            | -0.5 (0.5)       | 0.0 (0.6)        | -0.6 (-2.1 to 1.0)                                                   | 0.17                               | 0.473 |
| HRQoL, BC subscale, 0-40             | 0.6 (0.7)        | 2.0 (0.7)        | -1.5 (-3.5 to 0.5)                                                   | 0.38                               | 0.145 |
| FACT-B total score, 0-148            | 0.0 (1.8)        | 3.0 (1.9)        | -2.9 (-8.3 to 2.4)                                                   | 0.31                               | 0.275 |
| SWLS, 0-25                           | 0.0 (0.5)        | -0.7 (0.5)       | 0.7 (-0.7 to 2.0)                                                    | -0.26                              | 0.330 |

SE, standard error; CI, confidence interval; FACT-F, Functional Assessment of Cancer Therapy-Fatigue; CES-D, Center for Epidemiologic Studies-Depression Scale; FACT-B, Functional Assessment of Cancer Therapy-Breast; SWLS, Satisfaction With Life Scale.

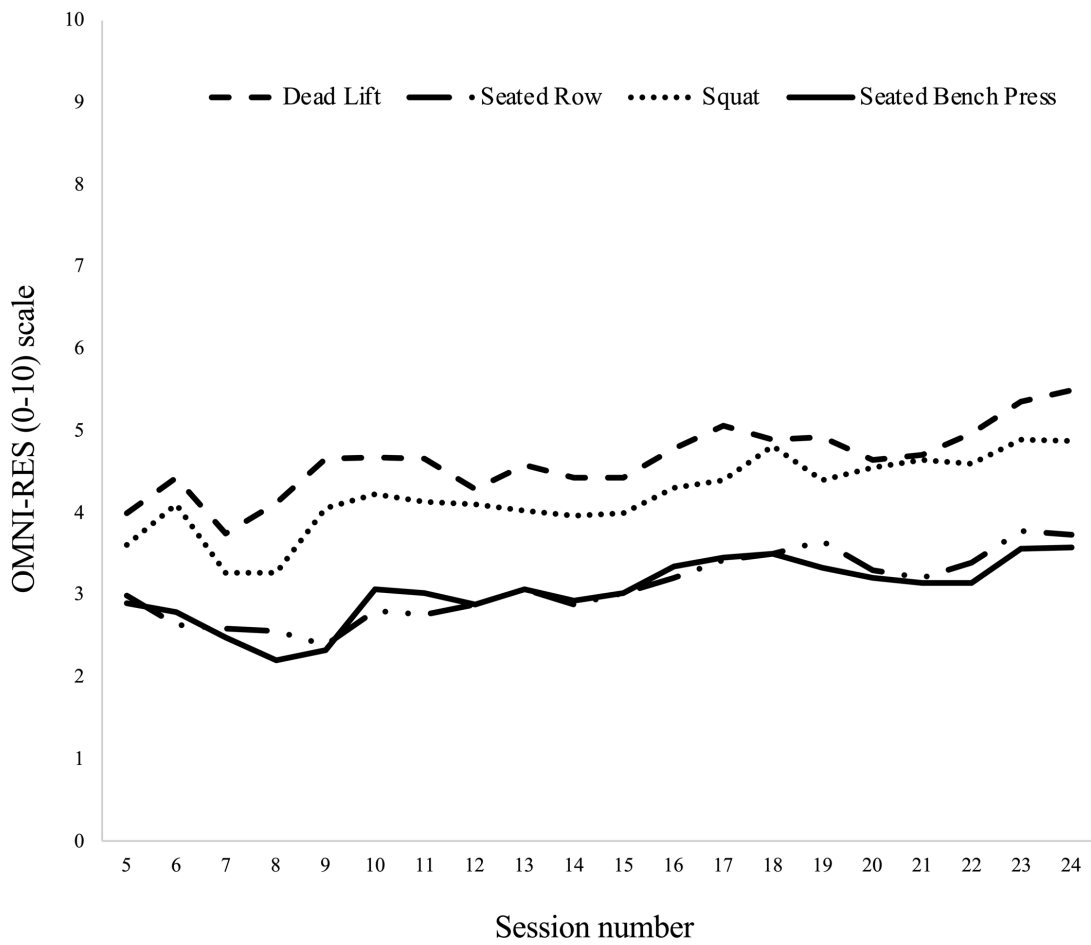

**Figure S1.** Perceived effort for each of the 4 main resistance exercises throughout the intervention, assessed through the OMNI Perceived Exertion Scale for Resistance Exercise (OMNI-RES).
